# Supplementary material for: Improving the identification of people with dementia in primary care: evaluation of the impact of primary care dementia coding guidance on identified prevalence
Source: HighWire-hosted journal article supplement (doi:10.1136/bmjopen-2013-004023), 2013-12-01
Supplement: bmjopen-2013-004023supp_appendix.pdf [file bmjopen-2013-004023supp_appendix.pdf]

## WEB APPENDIX 1 – LONDON DEMENTIA CODING GUIDANCE

### Guidance on Dementia Coding

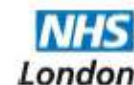

#### What is the big issue for London GPs in coding dementia?

There is a dementia diagnosis gap of 52% in London, which means that only 48% of those who we would expect to have dementia, based on population prevalence rates, are recorded on GP practice dementia registers<sup>1</sup>. We believe one of the reasons behind this apparently low diagnosis rate is a lack of accurate coding due to there being confusion with the available codes. This note for GPs contains guidance to help with this.

#### Why is it so important to diagnose and accurately code dementia?

1. It means the patient's care can be planned, managed and monitored, so that they can be signposted to supportive services and prescribed appropriate medication.
2. Diagnosis gives power to the patient and their families, as it brings clarity in terms of what is happening to them, and provides them with the ability to make choices themselves (National Dementia Strategy, 2009).
3. The coding of dementia and putting the patient on the dementia register means we can develop an accurate picture of London dementia rates to inform commissioning of high quality, cost effective services in response.
4. It means that GPs can see their own practice performance rise, and give patients confidence as they can see the identification rates on [www.myhealthlondon.nhs.uk](http://www.myhealthlondon.nhs.uk)

#### Making dementia coding simple

The coding of dementia can be less than straightforward, so a team of GPs working to improve dementia care in London, with support from specialist experts, has put together this GP dementia coding guideline.

#### Guideline

1. We propose the use of four codes in primary care, which are listed below.
2. If the specific type of dementia is unknown, for whatever reason, please use the code **Eu02z** "Unspecified dementia". This can always be changed later when more information is available. Please do not use 1461.00 "h/o dementia", 28E.00 "cognitive decline" or similar codes for this purpose – these do not allow aggregation.
3. Where some diagnostic data are available the codes **Eu00.** can be used for Alzheimer's disease, **Eu002** for mixed dementia, and **Eu01.** for vascular dementia. All others can be given **Eu02z**.
4. A full list dementia codes can be found below. This matches ICD10 codes to recognised general practice dementia READ codes. Where detailed information on subtype of dementia is available, then these can be used.

The main codes which General Practitioners should use to code for dementia in primary care are:

| ICD          |                                                                            | Read         |
|--------------|----------------------------------------------------------------------------|--------------|
| <b>F00</b>   | Dementia in Alzheimer's disease                                            | <b>Eu00.</b> |
| <b>F00.2</b> | Dementia in Alzheimer's disease, atypical or mixed type ("Mixed Dementia") | <b>Eu002</b> |
| <b>F01</b>   | Vascular dementia                                                          | <b>Eu01.</b> |
| <b>F03</b>   | Unspecified dementia                                                       | <b>Eu02z</b> |

<sup>1</sup> QOF data, 2010/11

## APPENDIX

| ICD10 |                                                                                                                                                                                                                                                                                                                                                                                                                                                 | READ                                                                                                  | ICD10 |                                                                                                                                                                                               | READ                               |
|-------|-------------------------------------------------------------------------------------------------------------------------------------------------------------------------------------------------------------------------------------------------------------------------------------------------------------------------------------------------------------------------------------------------------------------------------------------------|-------------------------------------------------------------------------------------------------------|-------|-----------------------------------------------------------------------------------------------------------------------------------------------------------------------------------------------|------------------------------------|
| F00   | Dementia in Alzheimer's disease                                                                                                                                                                                                                                                                                                                                                                                                                 | Eu00                                                                                                  | F05.1 | Delirium superimposed on dementia<br>Senile dementia with delirium                                                                                                                            | Eu041<br>E003                      |
| F00.0 | Dementia in Alzheimer's disease with early onset                                                                                                                                                                                                                                                                                                                                                                                                | Eu000                                                                                                 | F05.9 | Delirium, unspecified                                                                                                                                                                         | Eu04z                              |
| F00.1 | Dementia in Alzheimer's disease with late onset                                                                                                                                                                                                                                                                                                                                                                                                 | Eu001                                                                                                 | F06.0 | Organic hallucinosis<br>Other senile and presenile organic psychoses<br>Senile or presenile psychoses                                                                                         | Eu080<br>E00y<br>E00z              |
| F00.2 | Dementia in Alzheimer's disease, atypical or mixed type                                                                                                                                                                                                                                                                                                                                                                                         | Eu002                                                                                                 | F06.7 | Mild cognitive disorder                                                                                                                                                                       | Eu087                              |
| F00.9 | Dementia in Alzheimer's disease, unspecified                                                                                                                                                                                                                                                                                                                                                                                                    | Eu00z                                                                                                 | F10.7 | Residual and late onset psychotic disorder due to alcohol.<br>Including:<br>- Alcoholic dementia<br>- Other alcoholic dementia<br>- Chronic alcoholic brain syndrome                          | Eu107<br>Eu107 11<br>E012<br>E0120 |
| F01   | Vascular dementia<br>Arteriosclerotic dementia                                                                                                                                                                                                                                                                                                                                                                                                  | Eu01<br>E004                                                                                          | G30   | Alzheimer's disease                                                                                                                                                                           | F110                               |
| F01.1 | Multi-infarct dementia                                                                                                                                                                                                                                                                                                                                                                                                                          | Eu011                                                                                                 | G30.8 | Other Alzheimer's disease                                                                                                                                                                     |                                    |
| F01.2 | Subcortical vascular dementia                                                                                                                                                                                                                                                                                                                                                                                                                   | Eu012                                                                                                 | G30.9 | Alzheimer's disease, unspecified                                                                                                                                                              |                                    |
| F01.3 | Mixed cortical and subcortical vascular dementia                                                                                                                                                                                                                                                                                                                                                                                                | Eu013                                                                                                 | G30.0 | Alzheimer's disease with early onset                                                                                                                                                          | F1100                              |
| F01.8 | Other vascular dementia                                                                                                                                                                                                                                                                                                                                                                                                                         | Eu01y                                                                                                 | G30.1 | Alzheimer's disease with late onset                                                                                                                                                           | F1101                              |
| F01.9 | Vascular dementia, unspecified<br>Uncomplicated arteriosclerotic dementia<br>Arteriosclerotic dementia with delirium<br>Arteriosclerotic dementia with paranoia<br>Arteriosclerotic dementia with depression<br>Arteriosclerotic dementia NOS                                                                                                                                                                                                   | Eu01z<br>E0040<br>E0041<br>E0042<br>E0043<br>E004z                                                    | G31.0 | Circumscribed brain atrophy<br>Including:<br>- Fronto-temporal dementia<br>- Pick's disease<br>- Progressive isolated aphasia                                                                 | No Code<br>F111                    |
| F02   | Dementia in other diseases classified elsewhere                                                                                                                                                                                                                                                                                                                                                                                                 | Eu02                                                                                                  | G31.1 | Senile degeneration of the brain, not elsewhere classified                                                                                                                                    | F112                               |
| F02.0 | Dementia in Pick's disease                                                                                                                                                                                                                                                                                                                                                                                                                      | Eu020                                                                                                 | G31.8 | Other specified degenerative disease of the nervous system<br>Including<br>- Grey matter degeneration<br>- Lewy body disease<br>- Lewy body dementia<br>- Subacute necrotizing encephalopathy | F116<br>Eu025                      |
| F02.1 | Dementia in Creutzfeldt-Jakob disease                                                                                                                                                                                                                                                                                                                                                                                                           | Eu021                                                                                                 |       |                                                                                                                                                                                               |                                    |
| F02.2 | Dementia in Huntington's disease                                                                                                                                                                                                                                                                                                                                                                                                                | Eu022                                                                                                 |       |                                                                                                                                                                                               |                                    |
| F02.3 | Dementia in Parkinson's disease                                                                                                                                                                                                                                                                                                                                                                                                                 | Eu023                                                                                                 |       |                                                                                                                                                                                               |                                    |
| F02.4 | Dementia in HIV disease                                                                                                                                                                                                                                                                                                                                                                                                                         | Eu024                                                                                                 |       |                                                                                                                                                                                               |                                    |
| F02.8 | Dementia in other disease classified elsewhere<br>Dementia in conditions                                                                                                                                                                                                                                                                                                                                                                        | Eu02y<br>E041                                                                                         |       |                                                                                                                                                                                               |                                    |
| F03   | Unspecified dementia<br>Presenile dementia<br>Uncomplicated presenile dementia<br>Presenile dementia with delirium<br>Presenile dementia with paranoia<br>Presenile dementia with depression<br>Presenile dementia NOS<br>Uncomplicated senile dementia<br>Senile dementia with depressive or paranoid features<br>Senile dementia with paranoia<br>Senile dementia with depression<br>Senile dementia with depressive or paranoid features NOS | Eu02z<br>E001<br>E0010<br>E0011<br>E0012<br>E0013<br>E001z<br>E000<br>E002<br>E0020<br>E0021<br>E002z |       |                                                                                                                                                                                               |                                    |

**“Knowledge is power with respect to diagnosis, giving those affected and their families an understanding of what is happening and the ability to make choices themselves”**

**National Dementia Strategy, 2009**

For a copy of the London Dementia Needs Assessment or any queries about dementia diagnosis and care, please get in touch with [Jen.Watt@london.nhs.uk](mailto:Jen.Watt@london.nhs.uk) ; 020 7 932 2646
